# Supplementary material for: Comprehensive Analysis of Disease Pathology in Immunocompetent and Immunocompromised Hosts following Pulmonary SARS-CoV-2 Infection
Source: MDPI journal article supplement (doi:10.3390/biomedicines10061343), 2022-06-07
Supplement: s1 [file s1]

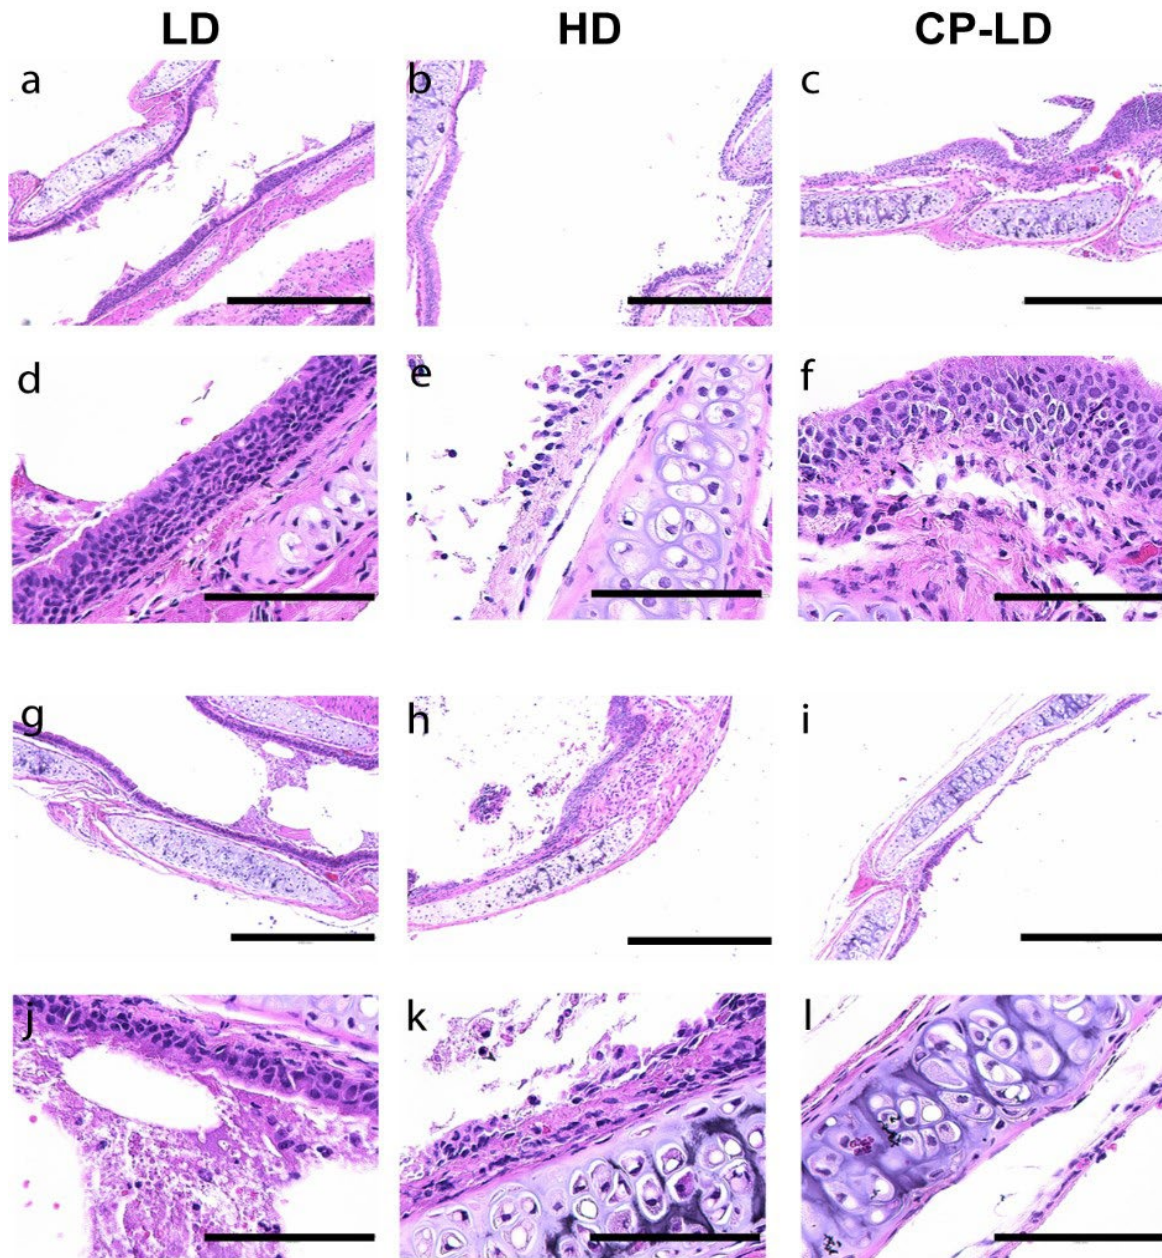

**Figure S1. Histopathology of the trachea in SARS-CoV-2 infected hamsters.**

Histopathological analysis of trachea (4, 7 and 16 dpi., n=3 per time point) revealed squamous metaplasia of tracheal epithelial cells (**a, d**) and accumulation of mucinous exudates and macrophages and neutrophils in the tracheal lumen (**g, j**) in LD infected hamsters at 7 dpi.

Epithelial metaplasia (**b, h, k**) and mucosal detachment (**b, e**) in HD infected hamsters on 4 and 7 d.p.i. Severe stratified squamous metaplasia (**c, f**) at 4 dpi and detachment of epithelial cells (**i, l**) on 16 d.p.i. in the cyclophosphamide treated LD infected hamsters. The images **a-c, g-i** are 100x and **d-f, j-l** are 400x magnifications. Scale bar represents 100  $\mu$ m (**d-f, j-l**) or 400  $\mu$ m (**a-c, g-i**).

**LD**-low dose; **HD**-high dose; **CP-LD**-cyclophosphamide treated (immunosuppressed) and low dose infected groups.

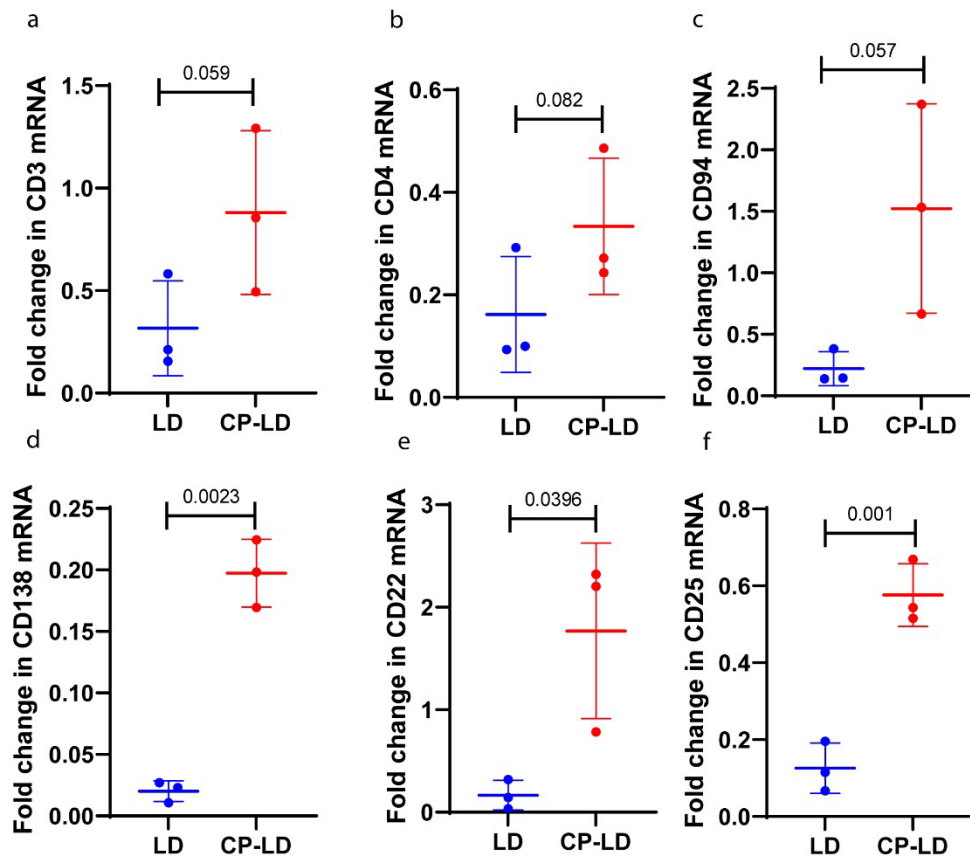

**Figure S2: qPCR analysis of B and T cell lineage markers in LD and CP-LD infected hamster lungs.** The level of T cell markers CD3, CD4, CD94 expression in the lungs was not significantly different between LD and CP-LD infected animals at 7 dpi (**a**, **b**, **c**), whereas expression of plasma cell marker CD138 (**d**), B cell marker CD22 (**e**) and Treg marker CD25 (**f**) was significantly down-regulated in LD, compared to CP-LD infected hamster lungs. The values are normalized with GAPDH/b-actin transcripts and represent the fold change in expression compared to uninfected hamsters. Statistical analysis was performed by two-sided Welch's t-test. Data represent mean ± sd (**a-f**). The blue, green, and red indicate LD, HD, and CP-LD infected hamsters, respectively, and each dot represents an individual hamster data (**a-f**). **LD**-low dose; **CP-LD**-cyclophosphamide treated (immunosuppressed) and low dose infected groups.



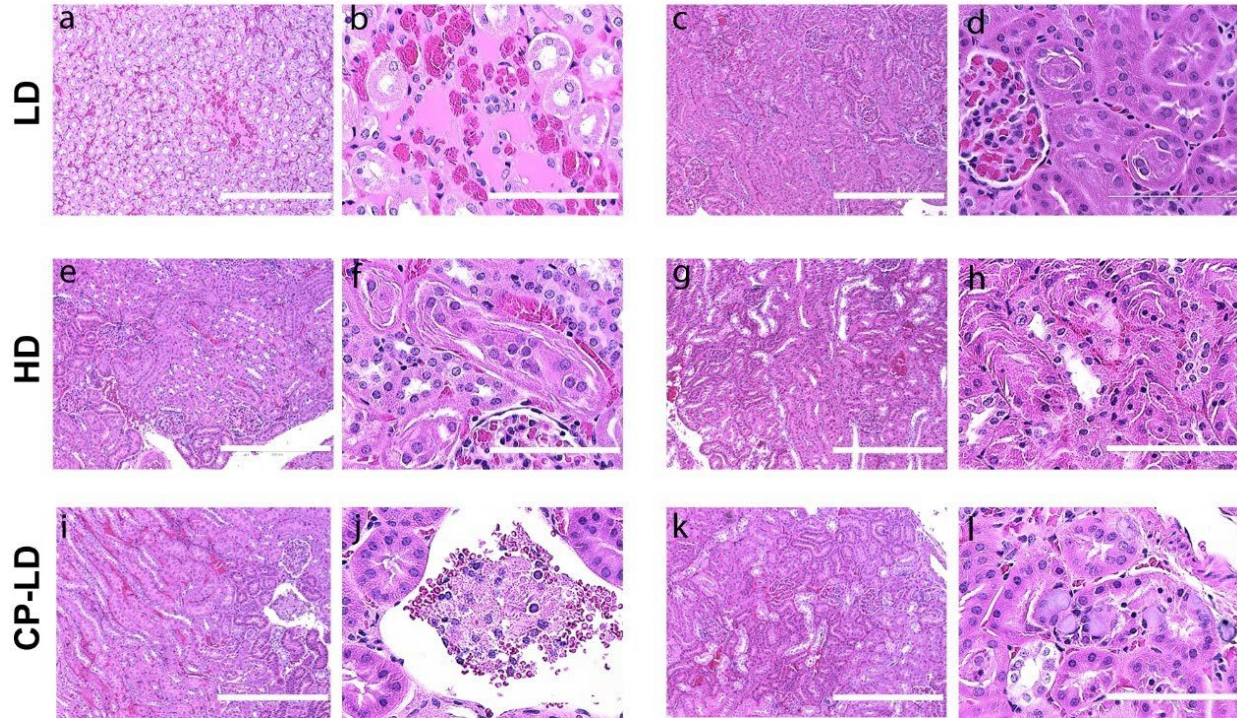

**Figure S3. Histopathology of the adrenal gland in SARS-CoV-2 infected hamsters.** A section of the adrenal cortex showing degenerated cells with pyknotic nuclei (**a, b**) on 4 dpi. and liquefaction necrosis in the medulla (**c, d**) on day 7 dpi. Hyperplasia/hypertrophy of adrenal cortex (**e, f**) and mild degeneration in the cortical cells (**f**) and liquefaction necrosis in the medullary chords (**g, h**) on 7 dpi. In CP-LD infected hamsters, severe degeneration and liquefaction necrosis in the cortex is seen as eosinophilic necrotic material (**i, j**) on 4 dpi and chromatolysis and necrosis of chromaffin cells in the medulla (**k, l**) on 7 dpi were observed. The images **a, e, i, c, g, k** are 100x and **b, f, j, d, h, l** are 400x magnifications. Scale bar represents 100  $\mu\text{m}$  (**b, f, j, d, h, l**) or 400  $\mu\text{m}$  (**a, e, i, c, g, k**). **LD**-low dose; **HD**-high dose; **CP-LD**-cyclophosphamide treated (immunosuppressed) and low dose infected groups.

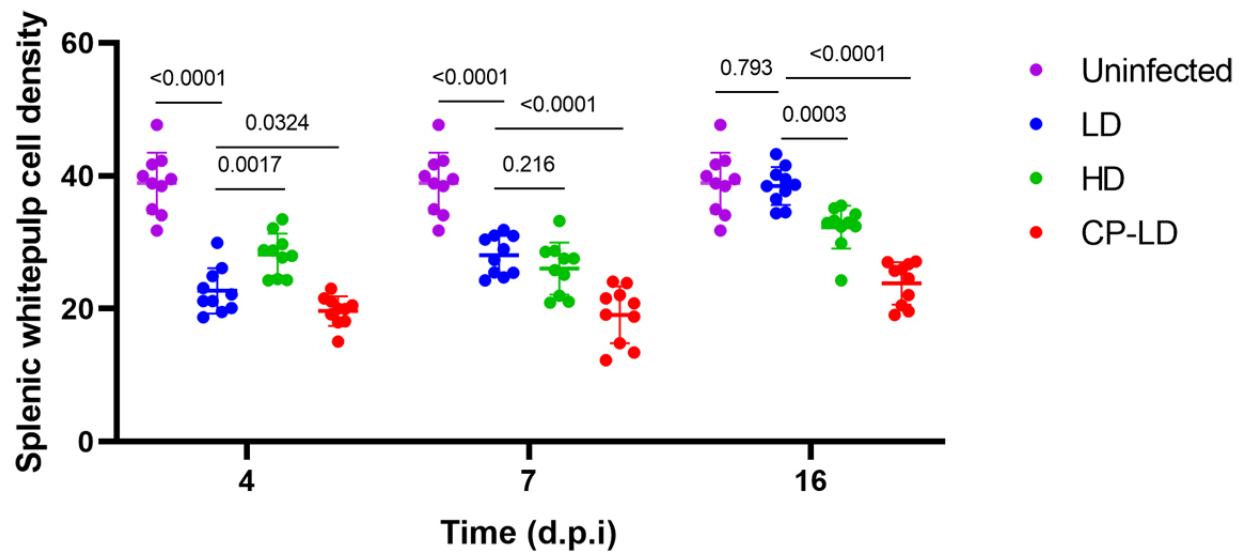

**Figure S4. White pulp content in the spleen of SARS-CoV-2 infected hamsters.**

Histopathological analysis at 4, 7 and 16 dpi revealed differential white pulp density in the spleen upon SARS-CoV-2 infection. **LD**-low dose; **HD**-high dose; **CP-LD**-cyclophosphamide treated (immunosuppressed) and low dose infected groups.



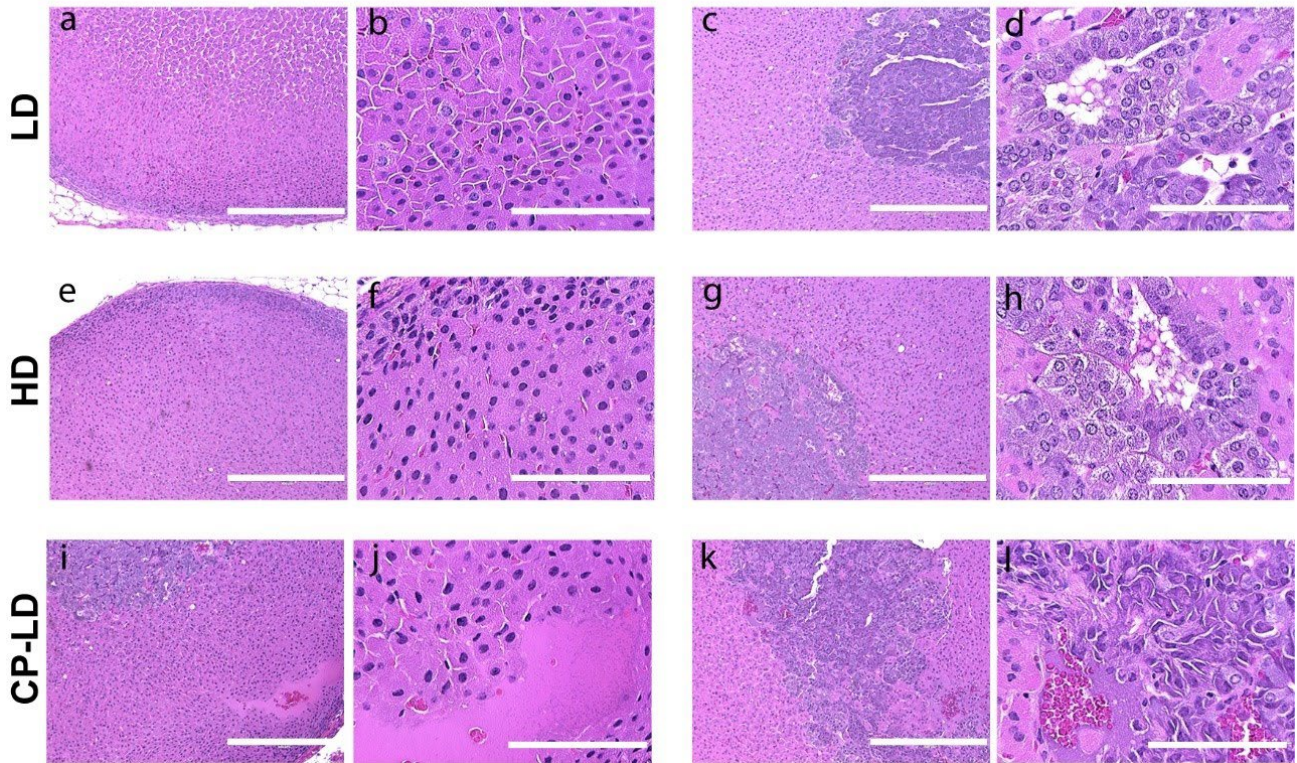

**Figure S5. Acute renal tubular necrosis in SARS-CoV-2 infected hamsters.**

Histopathological analysis of kidney (4, 7 and 16 dpi. n=3 per time point) revealed that the severe necrosis of renal tubules with karyolysis and accumulation of eosinophilic material in the tubular lumen (**a, b**) and tubular degeneration and mild infiltration of lymphocytes in the interstitium (**c, d**) following LD infection (4 d.p.i). HD infected hamsters' kidneys showed severe acute tubular necrosis of proximal convoluted tubules with pyknosis and loss of brush border into the lumen (**e, f, g, h**) on 4-16 dpi. Glomerular corpuscular necrosis and detachment from the arterioles (**i, j**) and basophilic ground-glass bodies in the cells of proximal convoluted tubules, pyknosis, and margination of the nucleus (**k, l**) in CP-LD infected hamsters on 16 dpi. The images **a, e, i, c, g, k** are 100x and **b, f, j, d, h, l** are 400x magnifications. Scale bar represents 100  $\mu\text{m}$  (**b, f, j, d, h, l**) or 400  $\mu\text{m}$  (**a, e, i, c, g, k**). LD-low dose; HD-high dose; CP-LD-cyclophosphamide treated (immunosuppressed) and low dose infected groups.

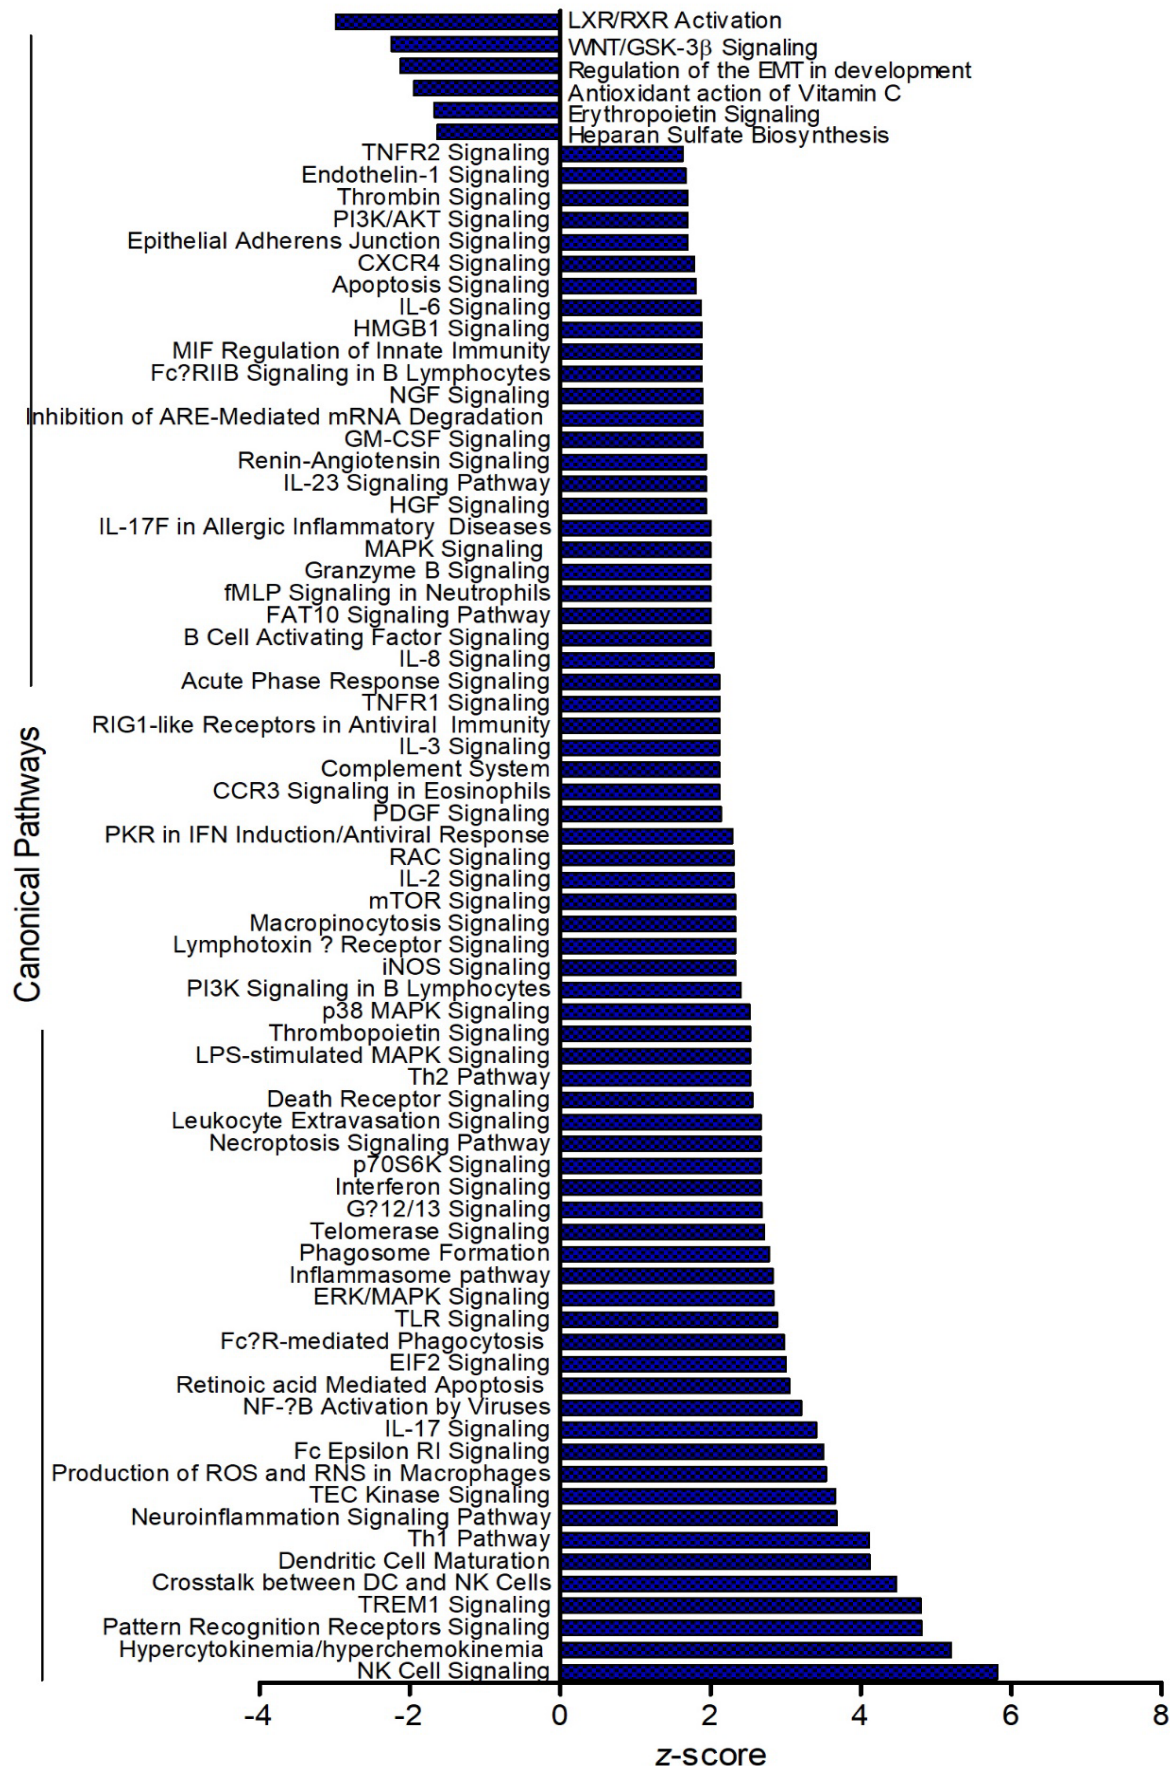

**Figure S6. Top canonical pathways operative in immunocompetent hamster lungs infected with low-dose SARS-CoV-2 at 4 days post-infection.** Pathways with positive z-score values are upregulated/activated, and those with negative z-score values are downregulated/suppressed.



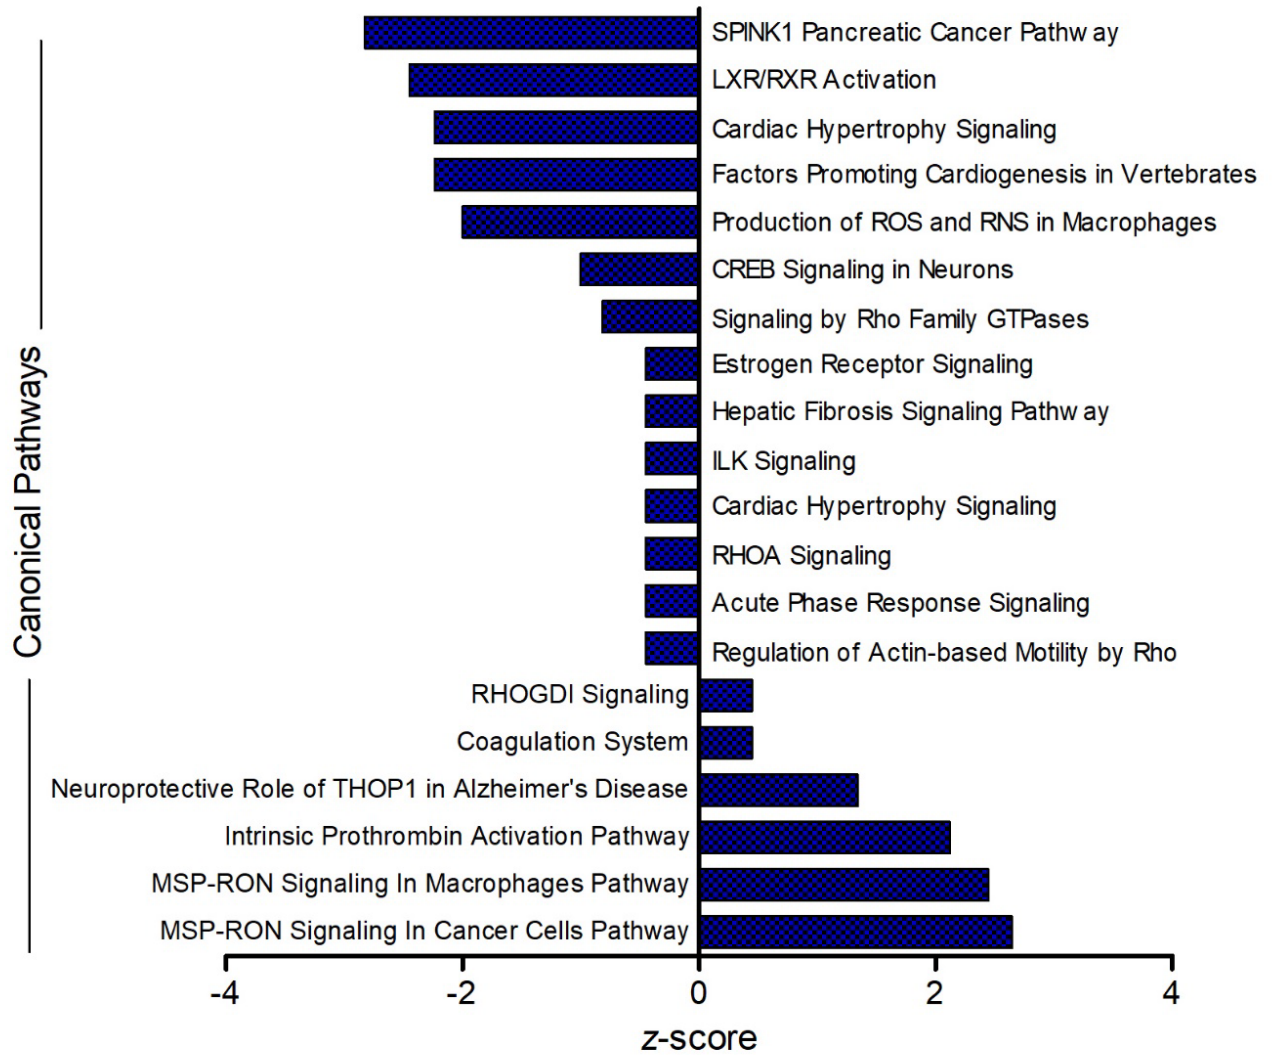

**Figure S7. Top canonical pathways operative in immunocompetent hamster lungs infected with low-dose SARS-CoV-2 at 16 days post-infection.** Pathways with positive z-score values are upregulated/activated, and those with negative z-score values are downregulated/suppressed.



Diagram illustrating the signaling pathway of Influenza A virus in an endothelial cell. Salicylic acid is shown at the top, leading to Influenza A. Influenza A then triggers a cascade of cytokines: IL-1, IL-2, CCL2, CXCL10, IL-6, TNF- $\alpha$ , IL1B, IL18, and IL33. The cytokines IL-1, IL-2, IL-6, IL1B, and IL18 are highlighted in pink boxes, while CCL2, CXCL10, TNF- $\alpha$ , and IL33 are in white boxes.

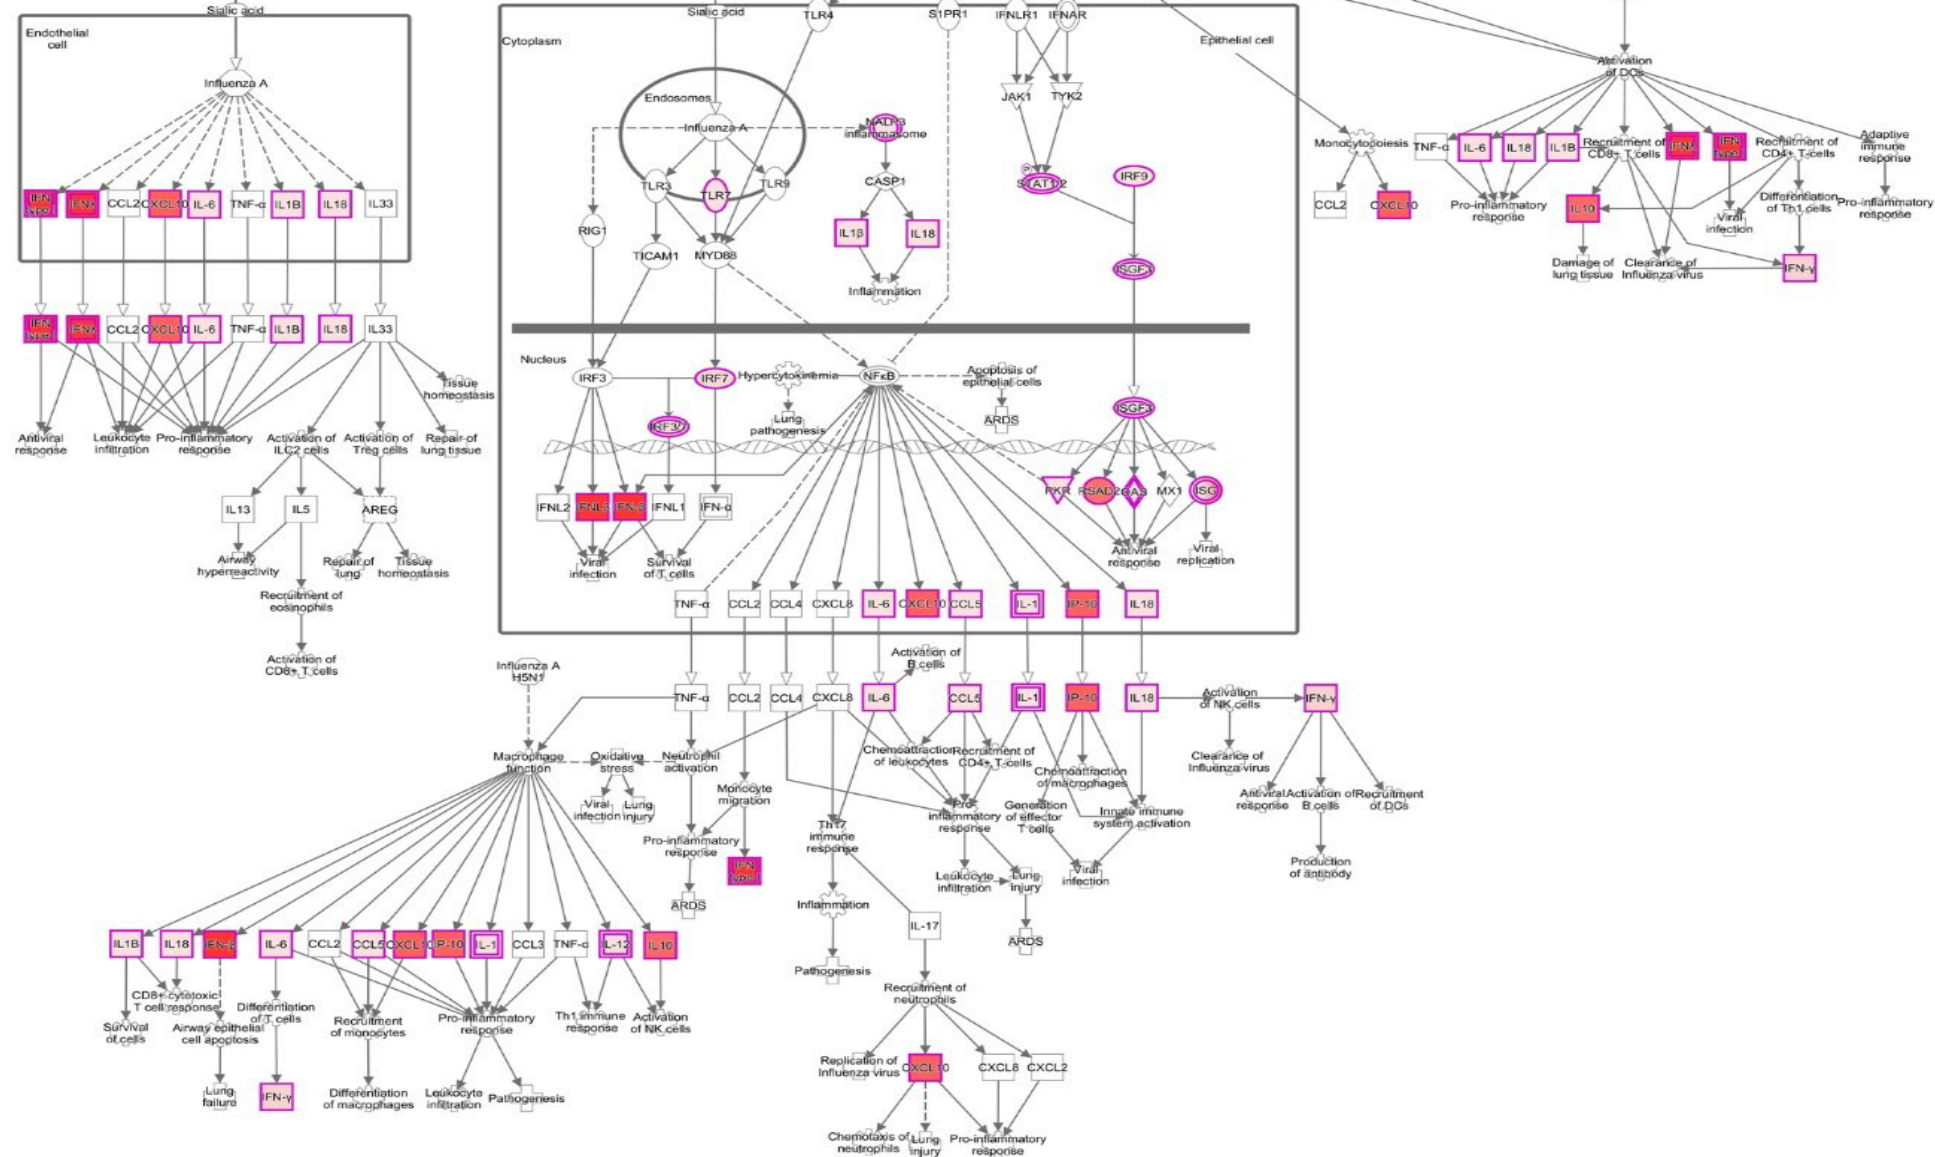

**Figure S8. Canonical hypercytokinemia/hyperchemokineemia pathway map.** Network genes and their interactions are shown with superimposed data from immunocompetent hamster lungs infected with low-dose SARS-CoV-2 at 4 dpi. Red color indicates upregulation, with the intensity of color proportional to the expression level (i.e., darker the color, stronger the expression).

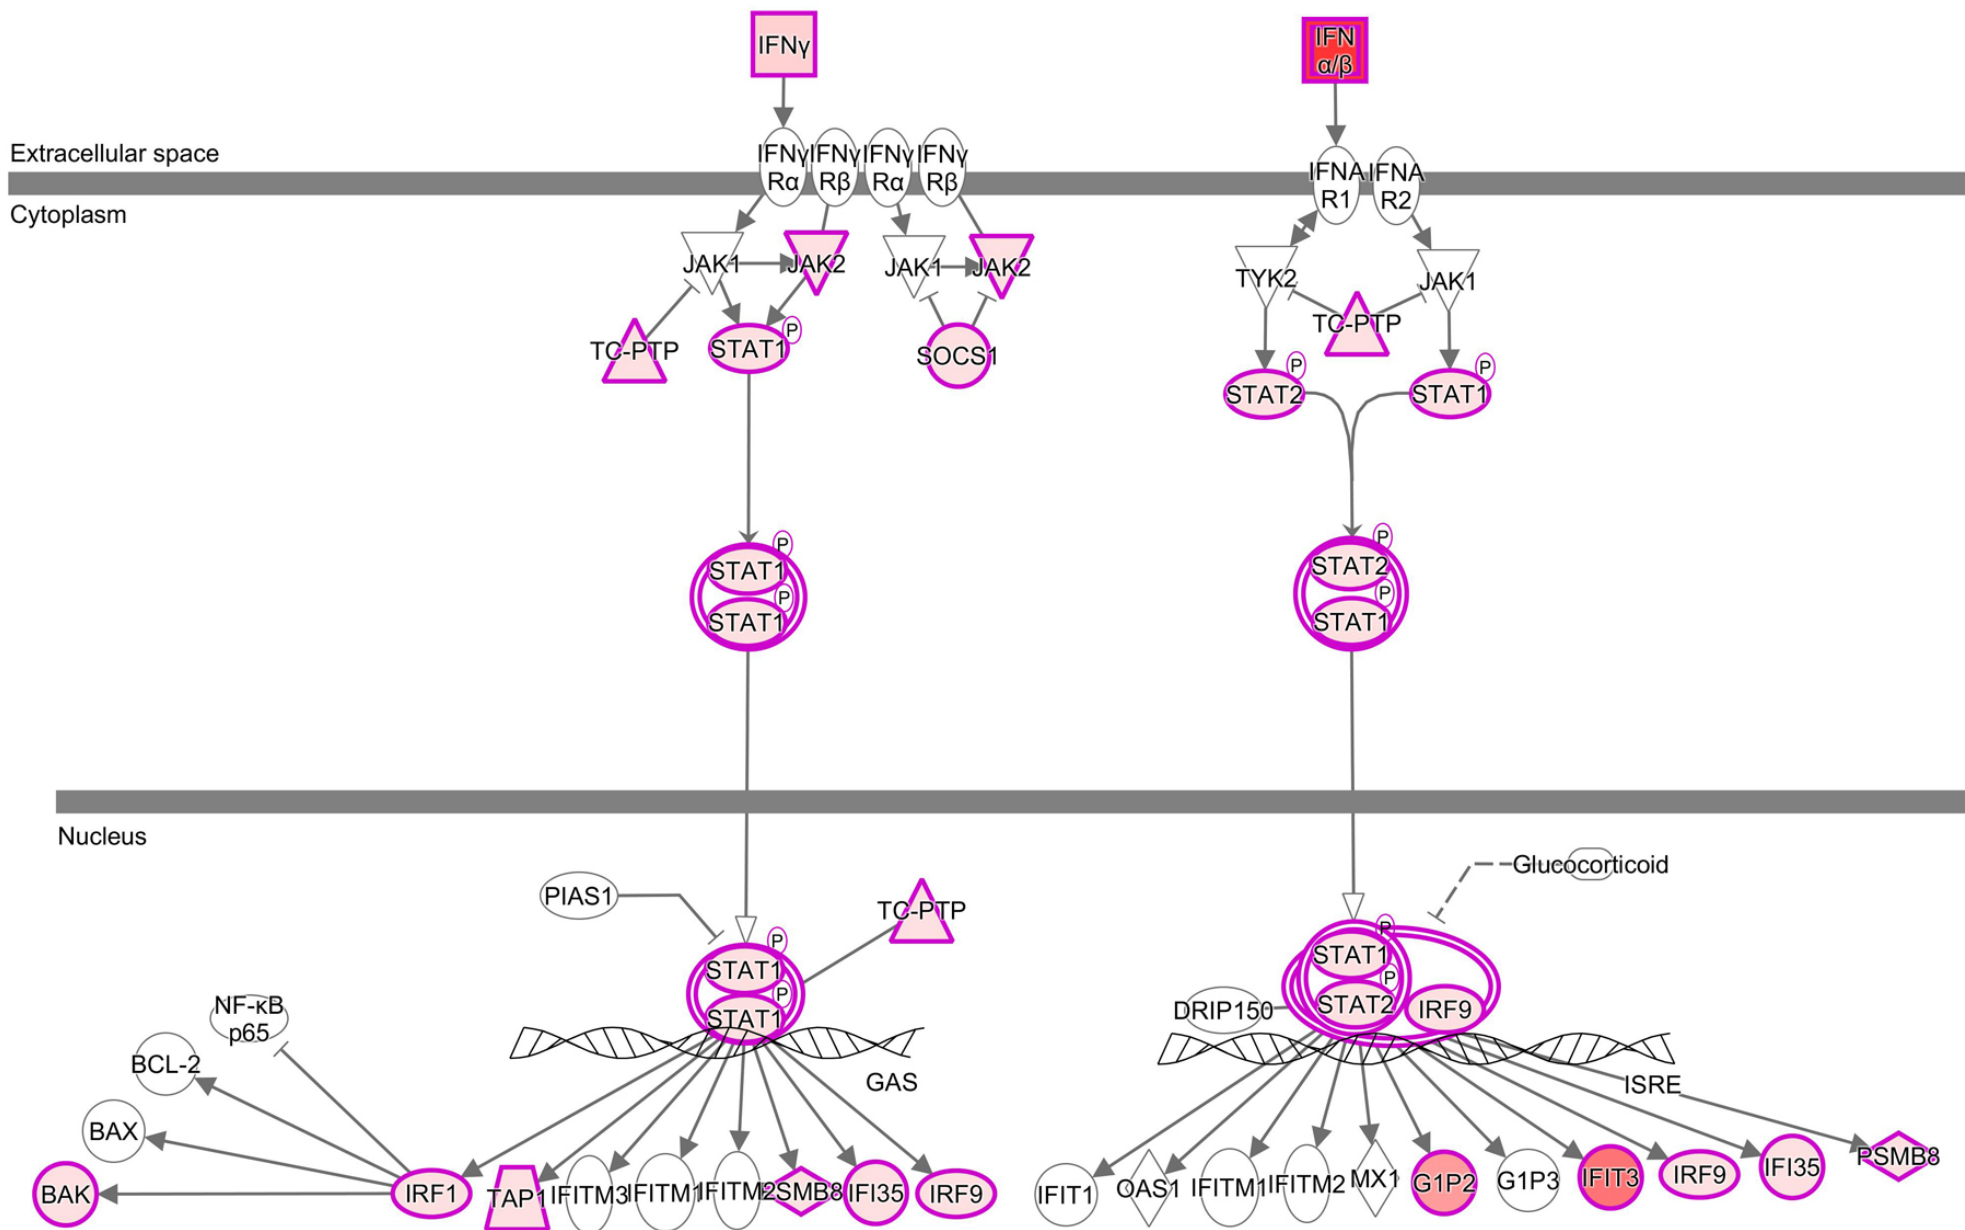



**Figure S9. Canonical interferon signaling pathway map.** Network genes and their interactions are shown with superimposed data from immunocompetent hamster lungs infected with low-dose SARS-CoV-2 at 4 dpi. Red color indicates upregulation, with the intensity of color proportional to the expression level (i.e., darker the color, stronger the expression).

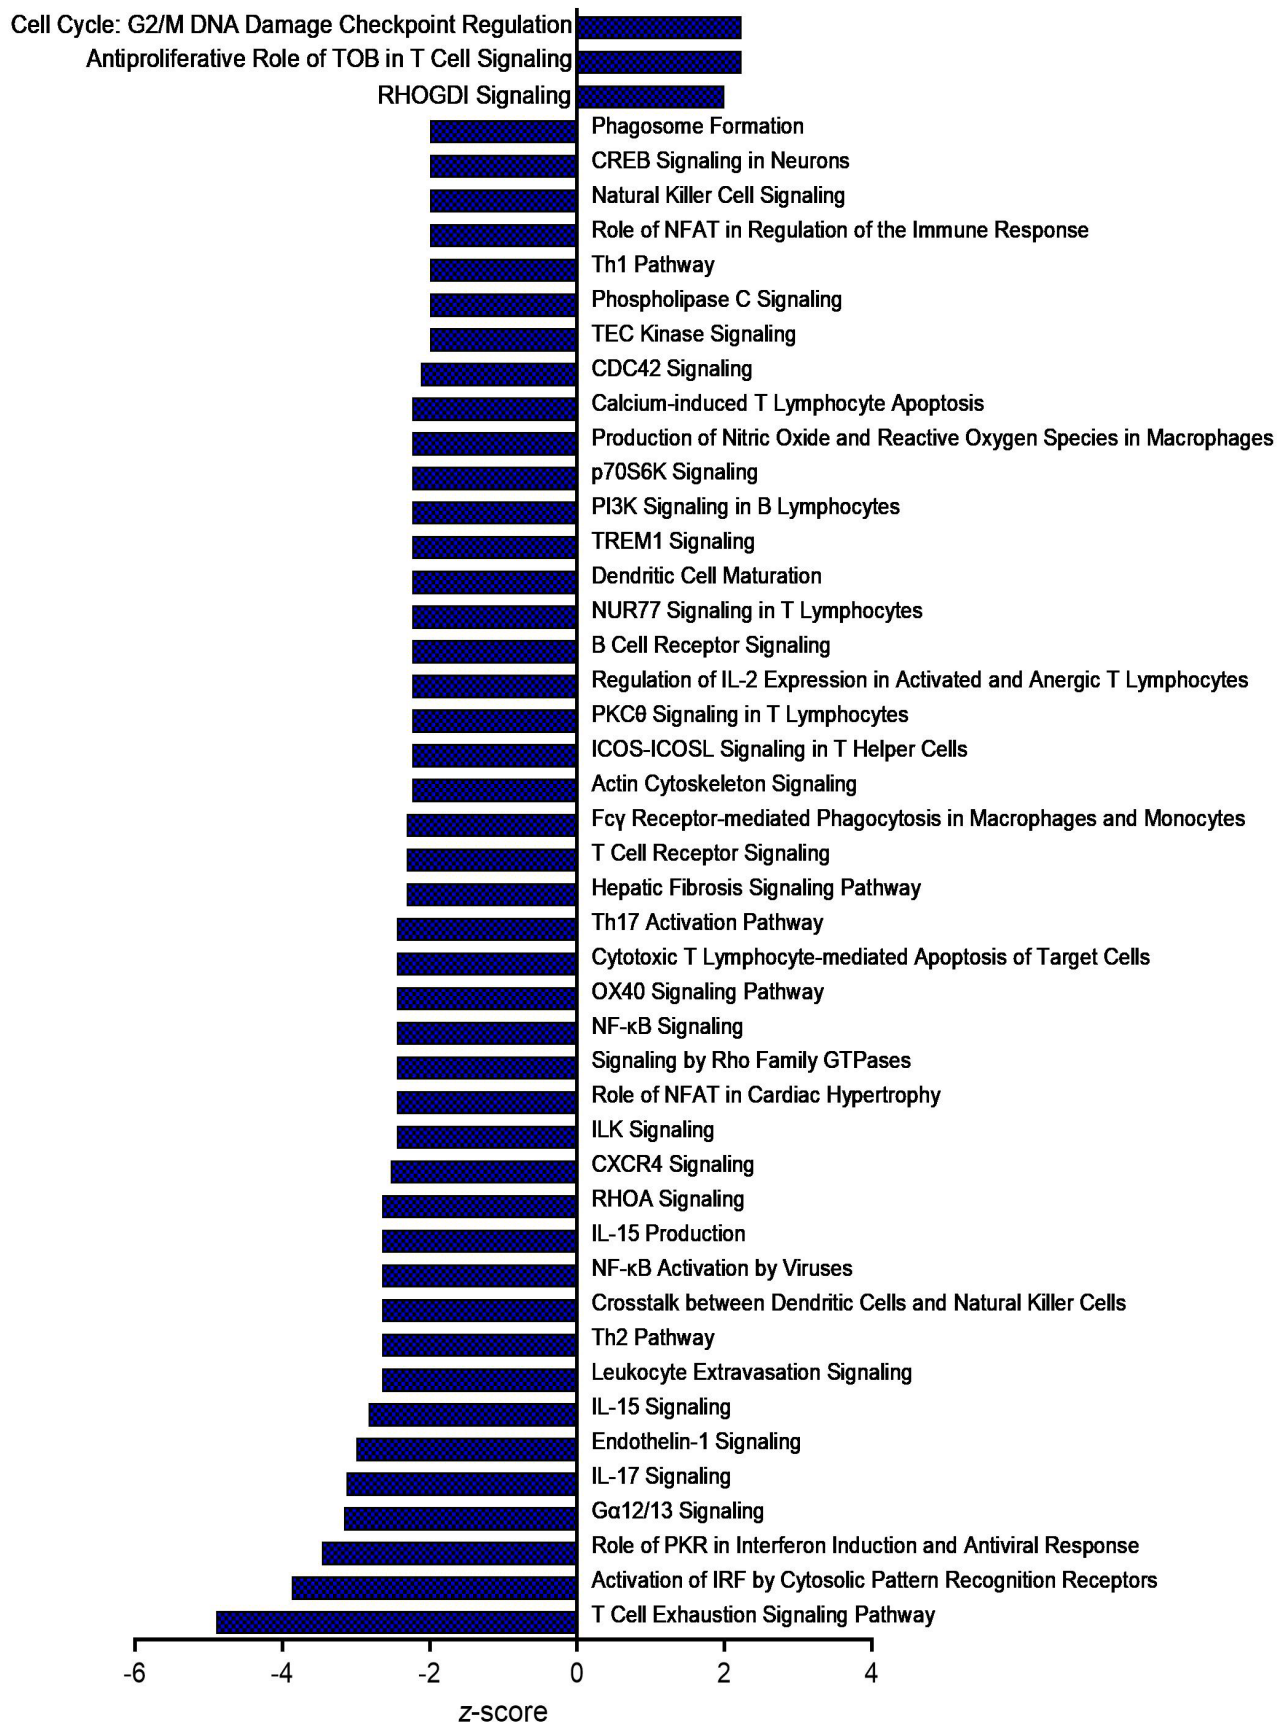

Canonical pathways

**Figure S10. Top canonical pathways operative in immunocompromised hamster lungs infected with low-dose SARS-CoV-2 at 4 days post-infection.** Pathways with positive z-score values are upregulated/activated, and those with negative z-score values are downregulated/suppressed.



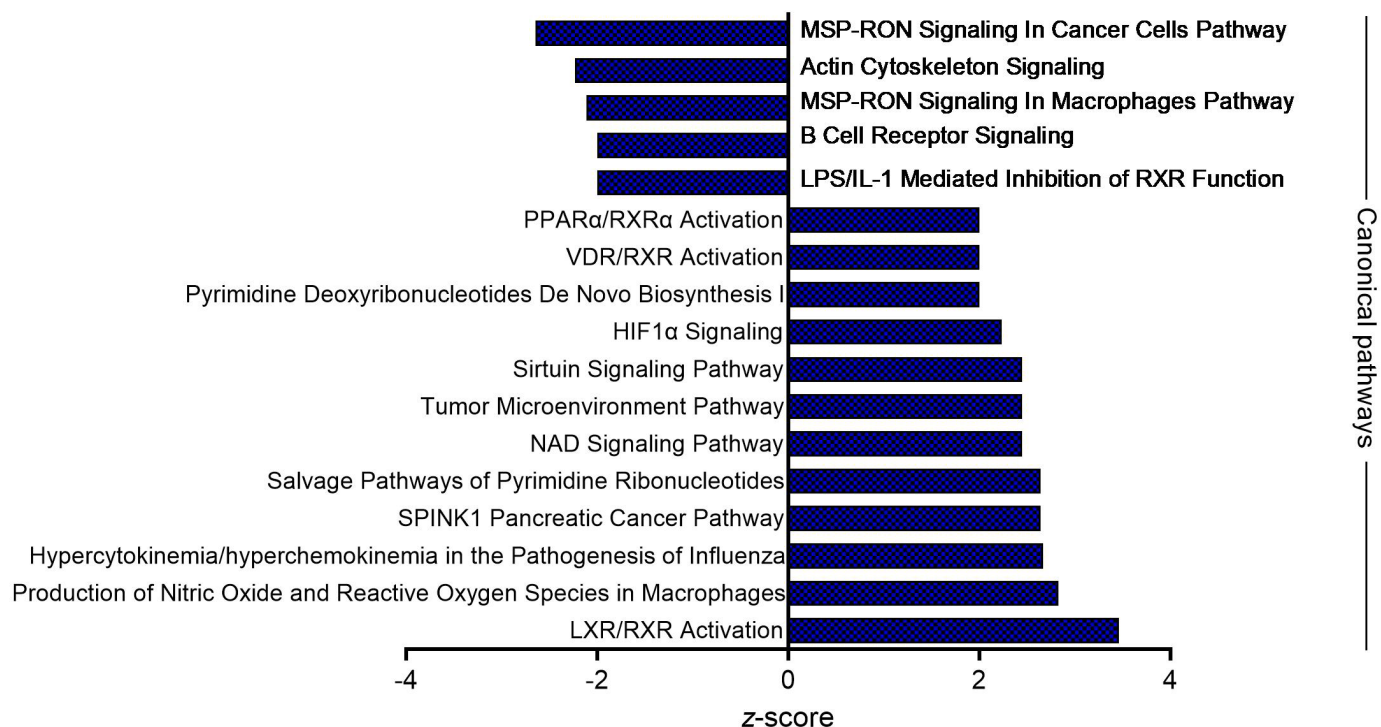

**Figure S11. Top canonical pathways operative in immunocompromised hamster lungs infected with low-dose SARS-CoV-2 at 16 days post-infection.** Pathways with positive z-score values are upregulated/activated and those with negative z-score values are downregulated/suppressed.

**Table S1.** Differentially regulated biological functions at 4dpi versus uninfected hamster lungs

| <i>Categories</i>                           | <i>Diseases or Functions Annotation</i> | <i>p-value</i> | <i>z-score</i> | <i>#<br/>Molecules</i> |
|---------------------------------------------|-----------------------------------------|----------------|----------------|------------------------|
| Antimicrobial activities of host cells      | Antimicrobial response                  | 1.74E-34       | 5.136          | 120                    |
| Cell Death and Survival                     | Cytotoxicity                            | 5.04E-24       | 5.514          | 81                     |
|                                             | Cytolysis                               | 1.43E-24       | 2.991          | 90                     |
| Cell-mediated Immune Response               | T cell development                      | 3.02E-47       | 5.186          | 187                    |
|                                             | Differentiation of T lymphocytes        | 6.43E-38       | 5.12           | 139                    |
|                                             | T cell homeostasis                      | 8.58E-51       | 5.283          | 195                    |
|                                             | T cell migration                        | 3.84E-34       | 5.073          | 111                    |
| Cell-To-Cell Signaling and Interaction      | Immune response of myeloid cells        | 2.82E-24       | 5.513          | 77                     |
|                                             | Response of antigen presenting cells    | 1.11E-26       | 5.295          | 82                     |
|                                             | Binding of myeloid cells                | 3.78E-22       | 4.156          | 74                     |
| Cellular Growth, Proliferation and Movement | Stimulation of cells                    | 1.12E-26       | 3.876          | 103                    |
|                                             | Stimulation of lymphatic system cells   | 9.23E-25       | 3.409          | 62                     |
|                                             | Stimulation of leukocytes               | 8.31E-25       | 4.241          | 70                     |
|                                             | Stimulation of mononuclear leukocytes   | 5.29E-25       | 3.65           | 63                     |
|                                             | Stimulation of lymphocytes              | 1.51E-25       | 3.487          | 61                     |
|                                             | Stimulation of T lymphocytes            | 8.42E-23       | 3.316          | 53                     |
|                                             | Recruitment of blood cells              | 1.8E-40        | 5.174          | 130                    |
|                                             | Recruitment of cells                    | 1.25E-40       | 4.998          | 137                    |
|                                             | Recruitment of myeloid cells            | 7.77E-33       | 4.314          | 105                    |
|                                             | Recruitment of leukocytes               | 2.36E-40       | 5.192          | 128                    |
|                                             | Recruitment of granulocytes             | 1.05E-24       | 4.268          | 79                     |
|                                             | Recruitment of phagocytes               | 3.33E-32       | 4.36           | 99                     |
|                                             | Recruitment of neutrophils              | 6.83E-24       | 3.993          | 71                     |
|                                             | Interaction of leukocytes               | 6.06E-34       | 6.442          | 131                    |
|                                             | Binding of leukocytes                   | 7.64E-34       | 6.415          | 130                    |
|                                             | Interaction of mononuclear leukocytes   | 1.56E-23       | 4.975          | 75                     |
|                                             | Binding of lymphocytes                  | 9.18E-23       | 4.496          | 63                     |
|                                             | Interaction of phagocytes               | 2.21E-24       | 4.483          | 77                     |
|                                             | Activation of myeloid cells             | 3.02E-25       | 4.178          | 109                    |
|                                             | Response of lymphocytes                 | 1.6E-28        | 2.621          | 82                     |
|                                             | Adhesion of immune cells                | 3.59E-32       | 6.276          | 121                    |
|                                             | Activation of mononuclear leukocytes    | 3.18E-51       | 4.954          | 186                    |
|                                             | Activation of lymphocytes               | 2.52E-51       | 4.9            | 181                    |

|                       |                                               |          |       |     |
|-----------------------|-----------------------------------------------|----------|-------|-----|
|                       | Activation of T lymphocytes                   | 1.09E-45 | 4.555 | 149 |
|                       | Activation of antigen presenting cells        | 1.74E-28 | 3.86  | 110 |
| Inflammatory Response | Immune response of leukocytes                 | 5.24E-41 | 6.073 | 130 |
|                       | Immune response of phagocytes                 | 1.8E-29  | 6.007 | 90  |
|                       | Response of phagocytes                        | 4.06E-31 | 6.004 | 97  |
|                       | Immune response of antigen presenting cells   | 8.26E-26 | 5.226 | 77  |
|                       | Degranulation of myeloid cells                | 2.78E-24 | 3.715 | 127 |
|                       | Degranulation of leukocytes                   | 1.07E-28 | 3.556 | 140 |
|                       | Degranulation of phagocytes                   | 2.44E-24 | 3.308 | 126 |
|                       | Inflammatory response                         | 1.14E-63 | 6.031 | 279 |
|                       | Cell-mediated response                        | 2.04E-31 | 3.697 | 85  |
|                       | Antibody response                             | 3.85E-23 | 3.625 | 62  |
|                       | Innate immune response                        | 1.47E-23 | 3.581 | 80  |
|                       | Degranulation                                 | 3.13E-35 | 3.572 | 171 |
| Cellular Development  | Differentiation of progenitor cells           | 4.52E-22 | 3.248 | 129 |
|                       | Proliferation of blood cells                  | 5.84E-67 | 3.852 | 294 |
|                       | Development of progenitor cells               | 9.63E-23 | 2.914 | 99  |
|                       | Differentiation of mononuclear leukocytes     | 3.4E-56  | 6.076 | 239 |
|                       | Development of mononuclear leukocytes         | 2.37E-56 | 5.85  | 239 |
|                       | Differentiation of antigen presenting cells   | 1.49E-23 | 4.623 | 77  |
|                       | Differentiation of phagocytes                 | 3.91E-24 | 4.441 | 91  |
|                       | Development of phagocytes                     | 4.49E-22 | 3.759 | 83  |
|                       | Development of hematopoietic progenitor cells | 3.01E-22 | 2.944 | 94  |
|                       | Proliferation of B lymphocytes                | 1.13E-23 | 4.06  | 94  |
|                       | Proliferation of mononuclear leukocytes       | 2.45E-62 | 4.27  | 259 |
|                       | Proliferation of immune cells                 | 5.7E-66  | 4.229 | 274 |
|                       | Proliferation of lymphocytes                  | 3.98E-60 | 4.155 | 253 |
|                       | Expansion of T lymphocytes                    | 6.37E-32 | 3.308 | 74  |
|                       | Cell proliferation of T lymphocytes           | 2.89E-56 | 3.12  | 217 |
|                       | Expansion of mononuclear leukocytes           | 2.12E-32 | 2.918 | 83  |
|                       | Expansion of lymphocytes                      | 4.17E-31 | 2.838 | 80  |
|                       | Expansion of leukocytes                       | 7.59E-33 | 2.739 | 87  |
|                       | Expansion of lymphoid cells                   | 1.72E-31 | 2.679 | 81  |



|                                            |                                       |          |        |     |
|--------------------------------------------|---------------------------------------|----------|--------|-----|
| Cellular Function and Maintenance          | Cellular homeostasis                  | 1.65E-52 | 5.611  | 425 |
|                                            | Function of leukocytes                | 1.35E-76 | 3.069  | 208 |
|                                            | Function of mononuclear leukocytes    | 5.35E-52 | 2.533  | 133 |
|                                            | Function of lymphocytes               | 1.32E-51 | 2.471  | 132 |
|                                            | Function of T lymphocytes             | 1.28E-43 | 2.021  | 109 |
| Free Radical Scavenging                    | Synthesis of reactive oxygen species  | 4.55E-24 | 5.031  | 142 |
|                                            | Metabolism of reactive oxygen species | 2.73E-24 | 4.901  | 148 |
| Humoral Immune Response, Protein Synthesis | Quantity of IgG                       | 9.45E-34 | 2.944  | 89  |
| Immunological Disease                      | Hypersensitive reaction               | 3.59E-34 | 3.937  | 143 |
|                                            | Immunodeficiency                      | 2.17E-27 | -3.252 | 105 |
| Organismal Survival                        | Organismal survival                   | 3.17E-56 | -2.157 | 560 |
|                                            | Morbidity or mortality                | 3.7E-59  | -2.177 | 572 |

**Table S2.** Differentially regulated biological functions at 16dpi versus uninfected hamster lungs

| Categories                                    | Diseases or Functions Annotation       | p-value  | z-score | # Molecules |
|-----------------------------------------------|----------------------------------------|----------|---------|-------------|
| Cellular Movement                             | Cellular infiltration by myeloid cells | 6.41E-06 | 3.241   | 14          |
|                                               | Cellular infiltration by phagocytes    | 2.23E-06 | 2.935   | 14          |
|                                               | Cellular infiltration by leukocytes    | 1.24E-09 | 2.882   | 22          |
|                                               | Cellular infiltration                  | 2.22E-09 | 2.871   | 23          |
|                                               | Cellular infiltration by granulocytes  | 7.28E-05 | 2.573   | 10          |
|                                               | Infiltration by neutrophils            | 0.00035  | 2.76    | 8           |
| Hematological System Development and Function | Quantity of macrophages                | 0.0004   | 2.532   | 9           |
| Organismal Injury and Abnormalities           | Edema                                  | 0.00045  | 2.747   | 12          |
| Organismal Survival and Cell Death            | Survival of organism                   | 1.51E-07 | -3.324  | 27          |
|                                               | Organismal death                       | 1.41E-08 | 2.554   | 58          |
|                                               | Necrosis of muscle                     | 0.000143 | 2.204   | 12          |
|                                               | Lung injury                            | 1.06E-06 | 2.007   | 12          |
|                                               | Cell death of muscle cells             | 0.00045  | 2.033   | 11          |
| Lipid Metabolism, Small Molecule Biochemistry | Fatty acid metabolism                  | 3.54E-09 | -2.253  | 25          |
|                                               | Transport of lipid                     | 0.000118 | -2.381  | 10          |
|                                               | Export of molecule                     | 0.000937 | -2.401  | 10          |
|                                               | Transport of molecule                  | 0.00097  | -2.613  | 32          |
| Cardiovascular Disease and Abnormalities      | Failure of heart                       | 7.23E-07 | 2.63    | 14          |
|                                               | Degeneration of heart                  | 2.16E-09 | 2.599   | 8           |
|                                               | Congestive heart failure               | 1.75E-05 | 2.236   | 8           |

**Table S3.** Differentially regulated biological functions in immunosuppressed SARS-CoV-2 infected hamster lungs at 4dpi

| <b>Categories</b>                      | <b>Diseases or Functions Annotation</b>         | <b>p-value</b> | <b>z-score</b> | <b># Molecules</b> |
|----------------------------------------|-------------------------------------------------|----------------|----------------|--------------------|
| Organismal survival                    | Cell survival                                   | 1.15E-17       | -5.865         | 86                 |
|                                        | Cell viability                                  | 2.72E-16       | -6.371         | 81                 |
|                                        | Cell viability of leukocytes                    | 1.59E-24       | -4.592         | 38                 |
|                                        | Cell viability of lymphocytes                   | 8.23E-20       | -4.07          | 29                 |
| Cell Morphology                        | Polarization of helper T lymphocytes            | 4.25E-13       | -2.753         | 11                 |
|                                        | Polarization of lymphocytes                     | 9.9E-15        | -2.495         | 16                 |
|                                        | Polarization of mononuclear leukocytes          | 1.33E-15       | -2.645         | 17                 |
|                                        | Polarization of Th1 cells                       | 6.44E-13       | -2.385         | 8                  |
| Cell Signaling and Molecular Transport | Flux of Ca <sup>2+</sup>                        | 2.37E-16       | -2.614         | 32                 |
|                                        | Mobilization of Ca <sup>2+</sup>                | 2.1E-17        | -2.439         | 34                 |
| Cell-mediated Immune Response          | Differentiation of effector T lymphocytes       | 2.47E-11       | -2.056         | 9                  |
|                                        | Differentiation of T lymphocytes                | 5.24E-28       | -2.383         | 50                 |
|                                        | Proliferation of thymocytes                     | 1.91E-14       | -2.802         | 17                 |
|                                        | T cell development                              | 5.05E-42       | -4.257         | 73                 |
|                                        | T cell homeostasis                              | 1.93E-44       | -4.457         | 76                 |
|                                        | T cell migration                                | 4.32E-20       | -2.333         | 36                 |
| Cell-To-Cell Signaling and Interaction | Interaction of lymphocytes                      | 1.83E-16       | -3.367         | 25                 |
|                                        | Interaction of T lymphocytes                    | 2.17E-14       | -3.125         | 21                 |
|                                        | Activation of lymphocytes                       | 2.35E-42       | -3.338         | 70                 |
|                                        | Activation of mononuclear leukocytes            | 5.82E-42       | -3.428         | 71                 |
|                                        | Activation of natural killer cells              | 2.65E-12       | -3.611         | 18                 |
|                                        | Activation of T lymphocytes                     | 2.23E-32       | -3.199         | 54                 |
| Cellular Growth and Development        | Maturation of blood cells                       | 2.92E-14       | -2.455         | 27                 |
|                                        | Maturation of cells                             | 2.73E-12       | -2.898         | 34                 |
|                                        | Proliferation of blood cells                    | 6.93E-54       | -2.429         | 104                |
|                                        | Proliferation of progenitor cells               | 5.63E-13       | -3.388         | 31                 |
|                                        | Development of B lymphocytes                    | 1.54E-13       | -2.097         | 20                 |
|                                        | Proliferation of hematopoietic progenitor cells | 3.24E-15       | -3.216         | 29                 |
|                                        | Dendropoiesis                                   | 1.9E-13        | -2.81          | 20                 |
|                                        | Development of antigen presenting cells         | 1.21E-12       | -2.142         | 22                 |
|                                        | Differentiation of antigen presenting cells     | 5.42E-16       | -2.836         | 27                 |
|                                        | Hematopoiesis of mononuclear leukocytes         | 1.87E-53       | -4.181         | 94                 |

|                                               |                                               |          |        |     |
|-----------------------------------------------|-----------------------------------------------|----------|--------|-----|
|                                               | Hematopoiesis of phagocytes                   | 1.19E-14 | -2.075 | 25  |
|                                               | Leukopoiesis                                  | 3.98E-54 | -4.343 | 101 |
|                                               | Development of hematopoietic progenitor cells | 5.94E-17 | -2.266 | 33  |
|                                               | Proliferation of immune cells                 | 1.83E-56 | -2.465 | 102 |
|                                               | Proliferation of lymphocytes                  | 1.9E-57  | -2.301 | 100 |
|                                               | Proliferation of mononuclear leukocytes       | 7.64E-58 | -2.464 | 101 |
|                                               | Maturation of lymphocytes                     | 3.47E-16 | -3.003 | 21  |
| Cellular Function and Maintenance             | Cellular homeostasis                          | 9.2E-31  | -4.633 | 111 |
|                                               | Ion homeostasis of cells                      | 2.36E-12 | -2.464 | 40  |
|                                               | Lymphocyte homeostasis                        | 5.57E-45 | -4.653 | 78  |
|                                               | Function of helper T lymphocytes              | 4.76E-20 | -2     | 20  |
| Cellular Movement and Immune Cell Trafficking | Cell movement of leukocytes                   | 1.43E-26 | -2.927 | 71  |
|                                               | Cell movement of lymphocytes                  | 7.35E-24 | -2.731 | 48  |
|                                               | Cell movement of mononuclear leukocytes       | 4.22E-23 | -2.673 | 51  |
| Hematological System Development and Function | Quantity of B lymphocytes                     | 5.47E-33 | -2.303 | 54  |
|                                               | Quantity of CD4+ T-lymphocytes                | 4.67E-30 | -2.354 | 41  |
|                                               | Quantity of lymphocytes                       | 6.31E-49 | -3.894 | 92  |
|                                               | Quantity of regulatory T lymphocytes          | 6.4E-13  | -2.507 | 19  |
|                                               | Quantity of T lymphocytes                     | 2.05E-38 | -3.039 | 71  |
|                                               | Quantity of leukocytes                        | 9.58E-51 | -3.909 | 105 |
|                                               | Quantity of mononuclear leukocytes            | 3.42E-48 | -3.771 | 93  |
| Inflammatory Response                         | Cell-mediated response                        | 1.1E-17  | -2.29  | 28  |
|                                               | Inflammatory response                         | 2.56E-18 | -2.386 | 59  |
| Cell Death and Survival                       | Apoptosis                                     | 3.45E-22 | 2.226  | 126 |
|                                               | Apoptosis of blood cells                      | 7.07E-32 | 2.173  | 60  |
|                                               | Apoptosis of leukocytes                       | 2.17E-31 | 2.224  | 57  |
|                                               | Apoptosis of lymphatic system cells           | 2.57E-28 | 3.066  | 49  |
|                                               | Apoptosis of lymphocytes                      | 3.78E-28 | 2.963  | 47  |
|                                               | Apoptosis of mononuclear leukocytes           | 2.54E-29 | 2.895  | 49  |
|                                               | Cell death of lymphatic system cells          | 1.62E-33 | 2.698  | 57  |
|                                               | Cell death of lymphocytes                     | 1.35E-34 | 2.549  | 56  |
|                                               | Cell death of mononuclear leukocytes          | 7.78E-36 | 2.464  | 58  |

|  |                        |          |       |     |
|--|------------------------|----------|-------|-----|
|  | Morbidity or mortality | 5.4E-15  | 5.817 | 107 |
|  | Organismal death       | 4.91E-14 | 5.658 | 104 |



**Table S4.** Differentially regulated biological functions in immunosuppressed SARS-CoV-2 infected hamster lungs at 16dpi

| Categories                               | Diseases or Functions Annotation        | p-value  | z-score | # Molecules |
|------------------------------------------|-----------------------------------------|----------|---------|-------------|
| Antimicrobial and Inflammatory Response  | Antimicrobial response                  | 3.65E-18 | 2.177   | 40          |
| Cellular Movement and Cellular immunity  | Cell movement                           | 8.33E-13 | 2.825   | 118         |
|                                          | Migration of cells                      | 1.66E-12 | 2.626   | 109         |
|                                          | Migration of mononuclear leukocytes     | 4.73E-10 | 2.138   | 33          |
|                                          | T cell migration                        | 2.47E-09 | 2.223   | 26          |
|                                          | Cell movement of T lymphocytes          | 1.01E-07 | 2.119   | 22          |
|                                          | Movement of CD4+ T-lymphocytes          | 5.62E-07 | 2.295   | 11          |
| Cellular Function and Maintenance        | Ion homeostasis of cells                | 7.37E-07 | 2.131   | 35          |
| Humoral Immune Response                  | Quantity of lymphoid tissue             | 4.37E-10 | -2.022  | 31          |
|                                          | Quantity of B lymphocytes               | 1.56E-12 | -2.696  | 35          |
|                                          | Quantity of marginal-zone B lymphocytes | 1.86E-07 | -2.06   | 12          |
|                                          | Quantity of IgG3                        | 1.85E-09 | -2.125  | 13          |
|                                          | Quantity of IgG2b                       | 4.97E-08 | -2.234  | 11          |
| Lipid Metabolism and Molecular Transport | Transport of lipid                      | 4.58E-12 | 3.482   | 27          |
|                                          | Transport of fatty acid                 | 6.46E-08 | 2.762   | 11          |
|                                          | Flux of lipid                           | 9.23E-08 | 2.519   | 15          |
|                                          | Transport of steroid                    | 2.75E-07 | 2.199   | 16          |
|                                          | Efflux of lipid                         | 3.47E-07 | 2.359   | 14          |
|                                          | Efflux of cholesterol                   | 6.07E-07 | 2.003   | 13          |
|                                          | Fatty acid metabolism                   | 9.78E-12 | 2.871   | 45          |
|                                          | Transport of carboxylic acid            | 3.18E-07 | 2.915   | 13          |
|                                          | Transport of molecule                   | 1.67E-06 | 3.905   | 72          |
|                                          | Protein-protein                         | 6.99E-08 | -2.578  | 18          |
| Organismal Injury and Abnormalities      | Fibrosis                                | 6.92E-14 | -2.792  | 57          |
|                                          | Morbidity or mortality                  | 9.64E-12 | -3.901  | 118         |
|                                          | Organismal survival                     | 4.96E-11 | -3.853  | 115         |
|                                          | Thrombus formation                      | 1.63E-09 | -2.375  | 22          |

**Table S5.** List of primers used for hamster and SARS-CoV-2 genes in the present study

| Gene target     | Name of the primer | Sequence 5'-3'           | Product size |
|-----------------|--------------------|--------------------------|--------------|
| 1 IL1B          | Ham_IL1b_F1        | AAAGCCTTGACCTGAGCTATC    | 110          |
|                 | Ham_IL1b_R1        | CTTCTCCACAGCCACAATGA     |              |
| 2 TNFA          | Ham_TNFA_F1        | GGTTTACTCCCAGGTTCTCTTC   | 112          |
|                 | Ham_TNFA_R1        | GGACAGGAGGTTGACGTTAT     |              |
| 3 IFNG          | Ham_IFNg_F1        | GCTATGTCTGGCTGCTACTG     | 99           |
|                 | Ham_IFNg_R1        | CCCTCCATTACGACATCTAAG    |              |
| 4 CCL2          | Ham_CCL2_F1        | CTGGACCAGAGTCAAGCTAAAT   | 110          |
|                 | Ham_CCL2_R1        | GGAAAGGCAGTAGTAGACACATTA |              |
| 5 MIP1A         | Ham_MIP1a_F1       | CCTCCTGCTGCTTCTTCTATG    | 118          |
|                 | Ham_MIP1a_R1       | TGCCGGTTTCTCTTGGTTAG     |              |
| 6 IL10          | Ham_IL10_F1        | AGCGCTGTCATCGATTTCTC     | 90           |
|                 | Ham_IL10_R1        | CGCCTTTCTCTTGGAGCTTAT    |              |
| 7 IL4           | Ham_IL4_F1         | GAAGAACTCCACGGAGAAAGAC   | 80           |
|                 | Ham_IL4_R1         | GGGTCACCTCATGTTGGAAATA   |              |
| 8 IL6           | Ham_IL6_F1         | GACTTCCATCCACTTGTCTTCT   | 104          |
|                 | Ham_IL6_R1         | TTGGGAGTAGTGTCTCTGT      |              |
| 9 IL7           | Ham_IL7_F1         | ACACAGATGCTGGTGAAGT      | 97           |
|                 | Ham_IL7_R1         | TCTCTCTCAGTAGCCTCTTTAGG  |              |
| 10 CCL5         | Ham_CCL5_F1        | TGCTTTGACTACCTCTCCTTTAC  | 109          |
|                 | Ham_CCL5_R1        | GGTTCCTTCGGGTGACAAA      |              |
| 11 ACTN         | Ham_b-actin_F1     | CCCAGAGCAAGAGAGGTATTC    | 90           |
|                 | Ham_b-actin_R1     | GGTGCCAGATCTTCTCCATATC   |              |
| 12 GAPDH        | Ham_GAPDH_F1       | AGAACGGGAAGCTTGTCATC     | 113          |
|                 | Ham_GAPDH_R1       | GCCAGTAGACTCCACAACATAC   |              |
| 13 SARS-CoV-2-N | SARS-CoV-2 N_F1    | GTGATGCTGCTCTTGCTTTG     | 97           |
|                 | SARS-CoV-2 N_R1    | GTGACAGTTTGGCCTTGTTG     |              |
